# Supplementary material for: A transcription regulatory network within the ACE2 locus may promote a pro-viral environment for SARS-CoV-2 by modulating expression of host factors
Source: bioRxiv or medRxiv preprint supplement (doi:10.1101/2020.04.14.042002), 2020-04-24
Supplement: Supplementary file [file media-1.pdf]

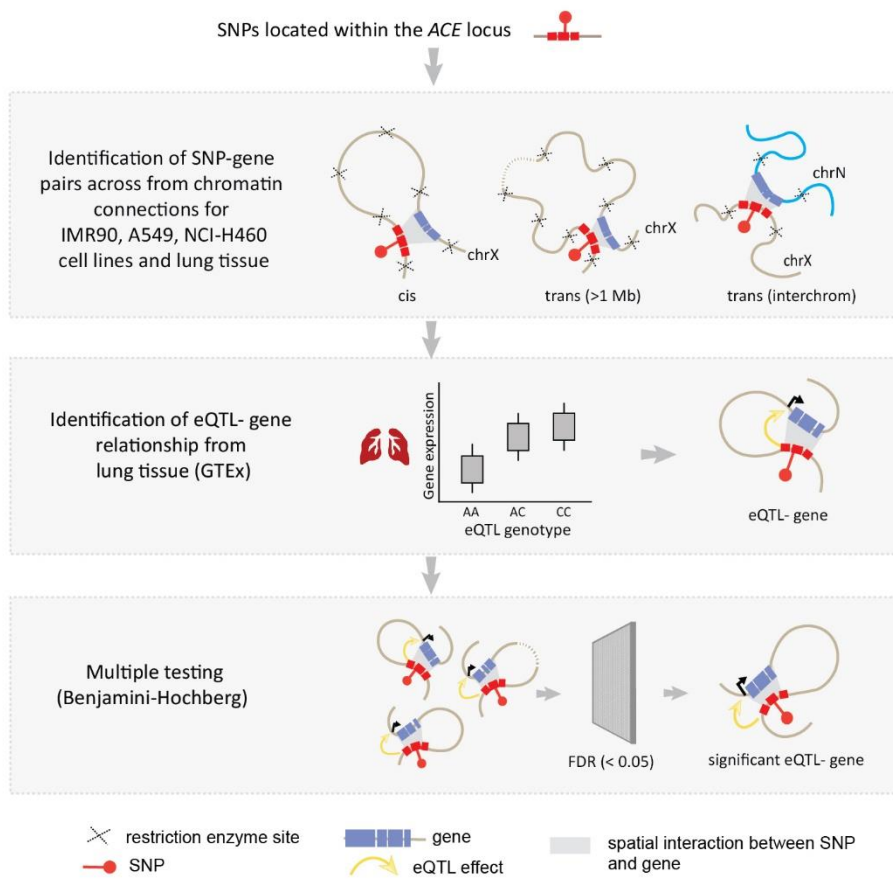

S1 Figure. **The CoDeS3D algorithm used in this study.** Modified from Gokuladhas *et al.* 2020 [1].

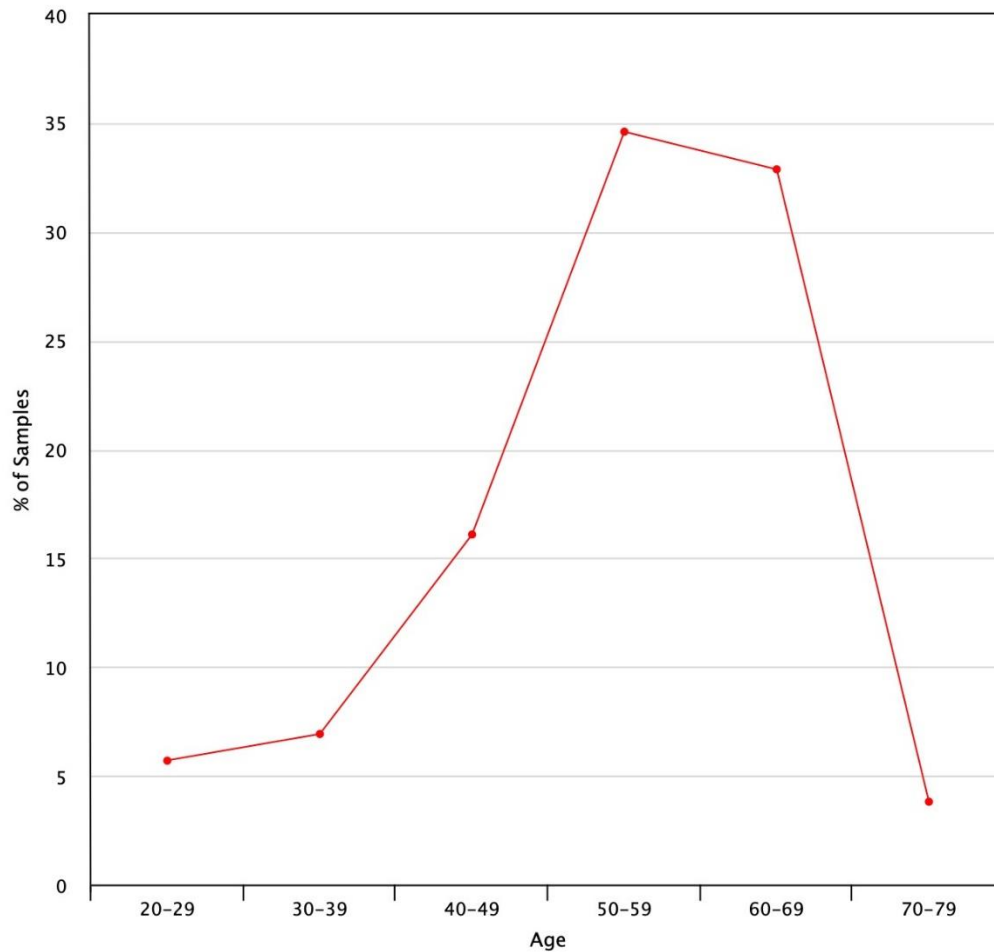

**S2 Figure. The eQTL data used in this study was obtained from lung samples taken from middle-aged individuals.** To assess the correlation of genetic variation with the changes in gene expression, the GTEx project (<https://gtexportal.org/home/>) collected and analysed lung samples from donors who were densely genotyped. The age-distribution graph illustrates that approximately 70% of the lung samples that were obtained were from donors aged between 50 and 60.

### Supplementary references

1. Gokuladhas S, Schierding W, Cameron-Smith D, Wake M, Scotter E, O'Sullivan JM. Shared regulatory pathways reveal novel genetic correlations between grip strength and neuromuscular disorders. *Front Genet.* 2020;In Press. doi:10.3389/fgene.2020.00393
